# Supplementary material for: Increasing cognitive load attenuates right arm swing in healthy human walking
Source: PubMed Central journal article supplement (PMC5319362; doi:10.1098/rsos.160993), 2017-01-25
Supplement: rsos160993supp1.pdf [file rsos160993supp1.pdf]

high baseline ASI

symmetrical

low baseline ASI

Incongruent Stroop  
Congruent Stroop  
Normal walking  
Incongruent Stroop  
Congruent Stroop  
Normal walking  
Incongruent Stroop  
Congruent Stroop  
Normal walking

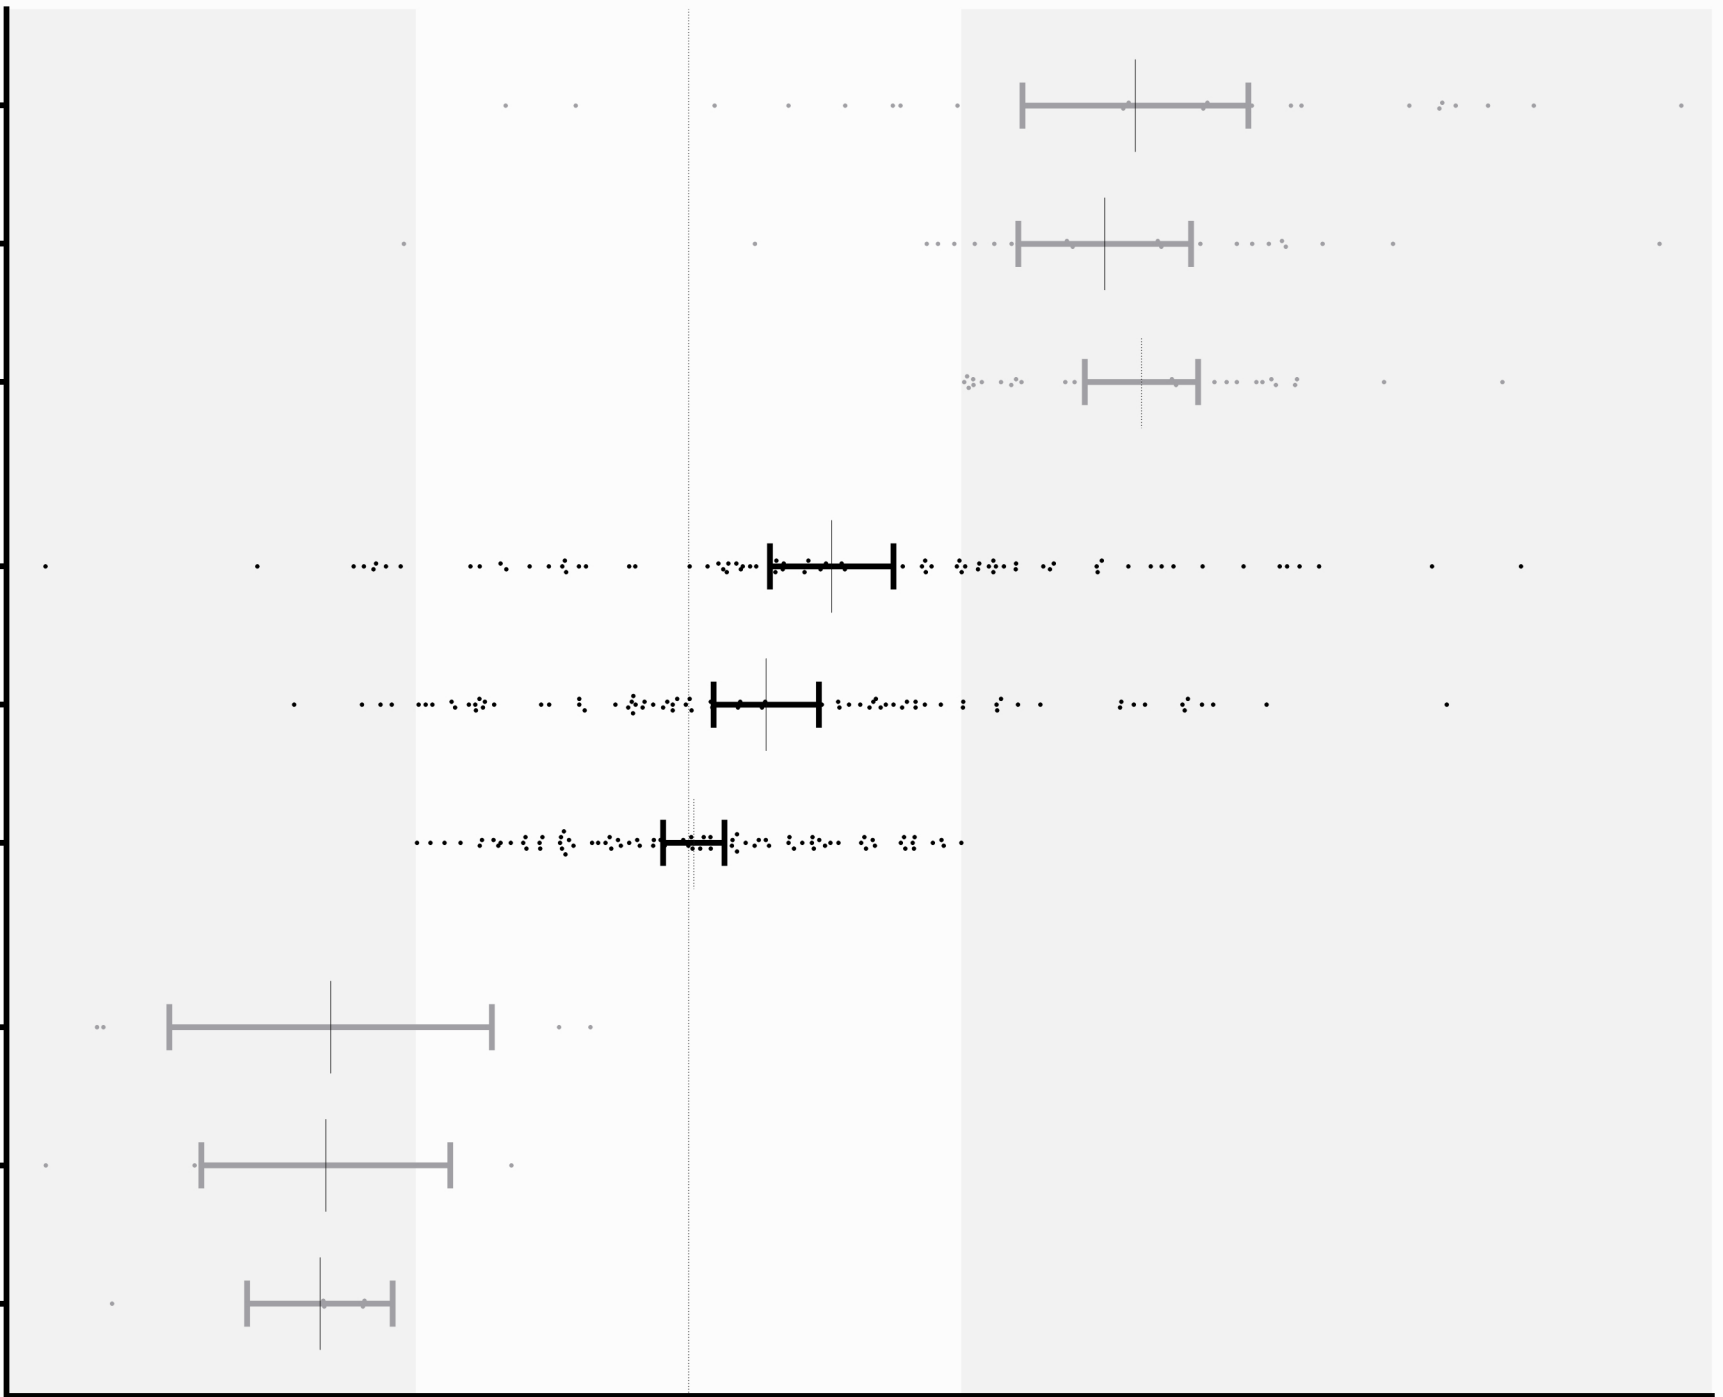

-50 -25 symmetrical 25 50 75

Arm Swing Symmetry Index
