# Supplementary material for: Increasing cognitive load attenuates right arm swing in healthy human walking
Source: PubMed Central journal article supplement (PMC5319362; doi:10.1098/rsos.160993), 2017-01-25

# Arm Swing Symmetry Index

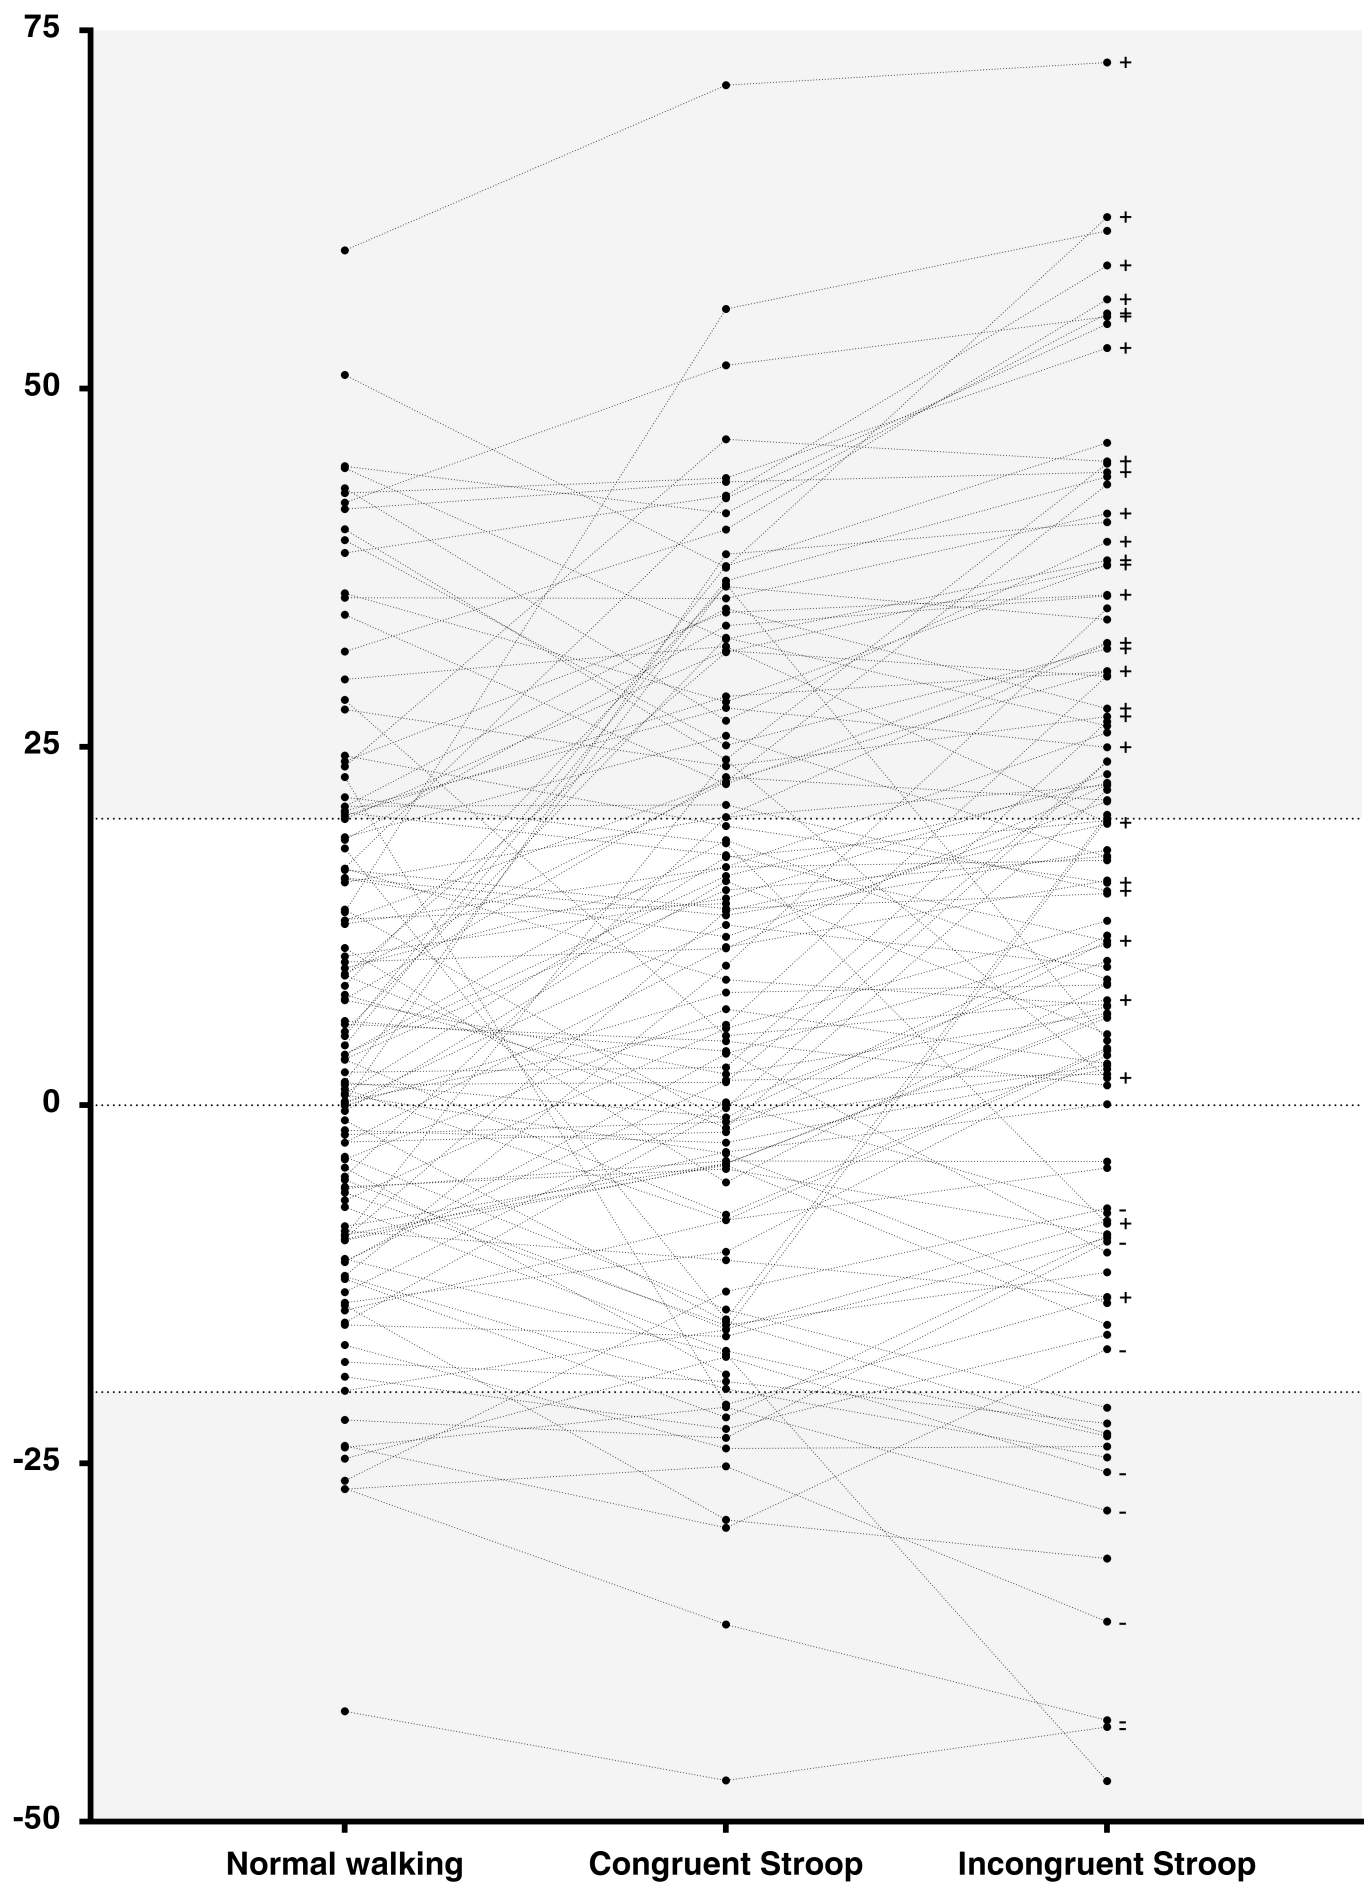

Supplement: rsos160993supp2.pdf [file rsos160993supp2.pdf]
